# Supplementary material
Source: publisher site journal article supplement (https://www.spandidos-publications.com/5338/downloadSupplementary)

Figure S1. Anti-miR-130a-3p inhibits the migration of cervical cancer cells. Wound healing assay in (A) CaSki and (B) C-4I cells. Both cell lines exhibited a significantly reduced migration following the inhibition of miR-130a-3p compared with the negative control cells. Bars represent the standard deviation. \* $P<0.05$ , \*\* $P<0.01$ , \*\*\* $P<0.001$  and \*\*\*\* $P<0.0001$ . ns, not significant; miR, microRNA.

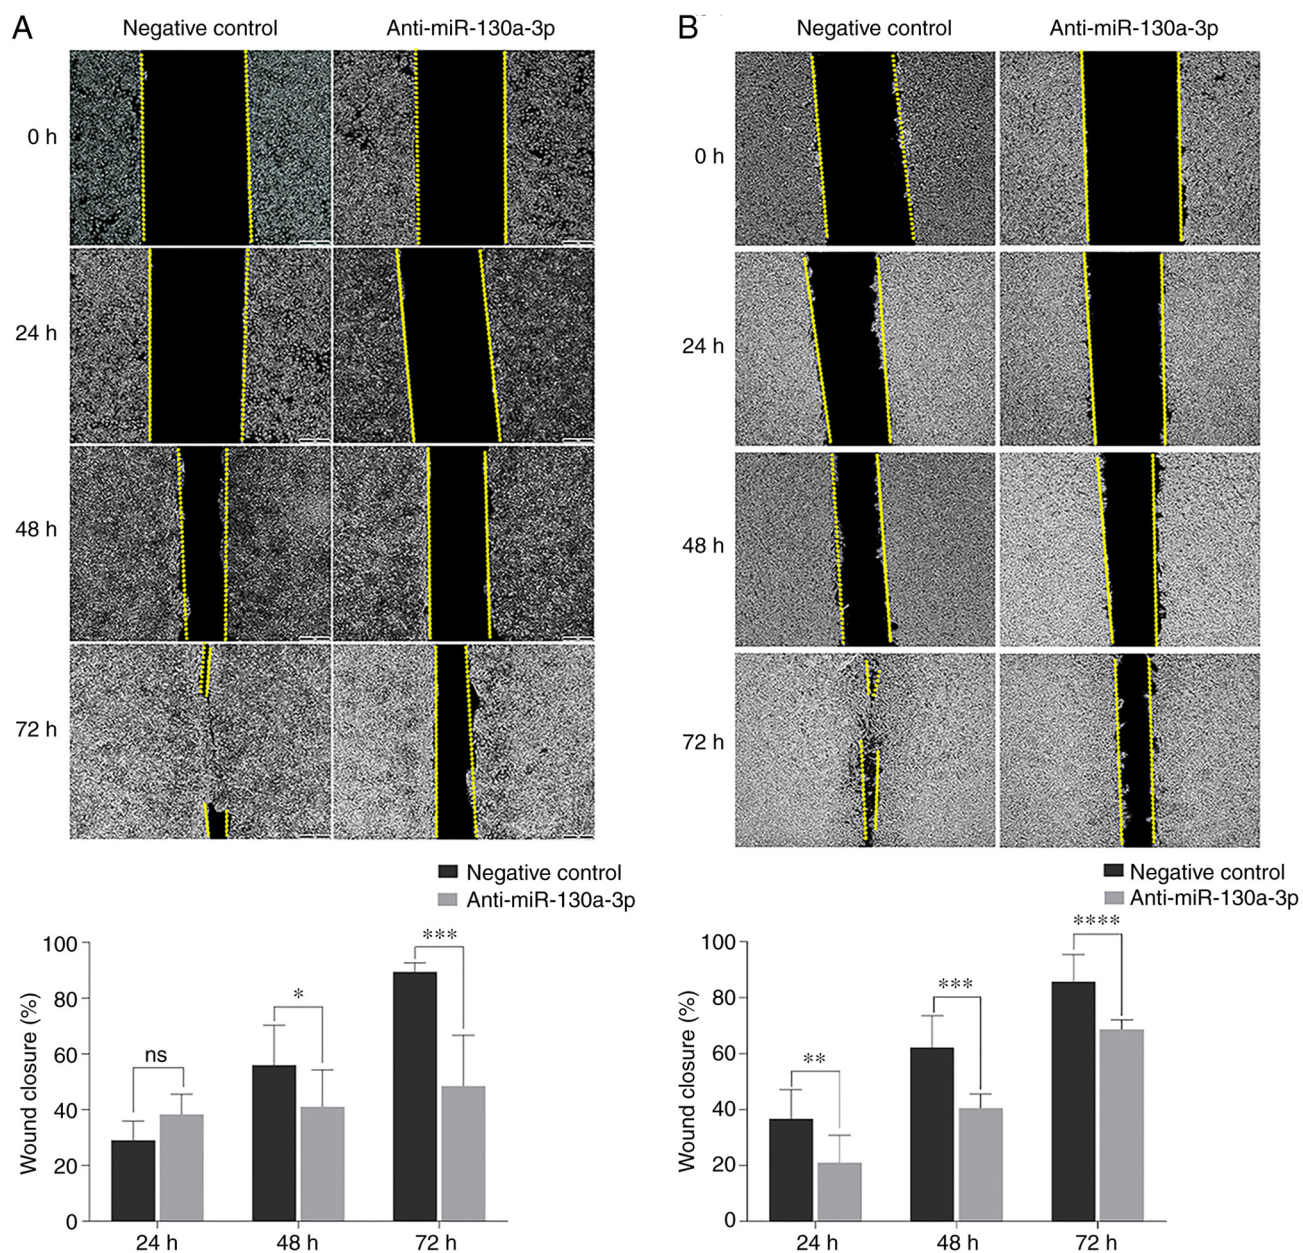

Figure S2. *DLL1* and *WNT10A* are highly expressed in the primary cervical cancer cell line HCB-514. The black bars indicate the *DLL1* gene, while the gray bar indicate the *WNT10A* gene. The bars represent the standard deviation. \*\*P=0.0089 and \*\*\*P=0.001. *DLL1*, delta-like Notch1 ligand; *WNT10A*, Wnt family member 10a; miR, microRNA.

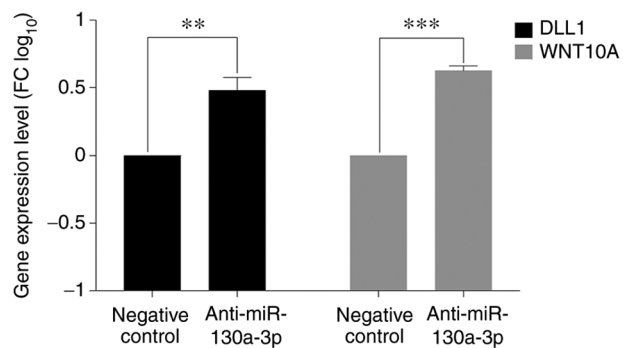

Supplement: Supplementary file 1 [file downloadSupplementary]
